# Supplementary material for: Structure of the IscB–ωRNA ribonucleoprotein complex, the likely ancestor of CRISPR-Cas9
Source: PubMed Central journal article supplement (PMC9640706; doi:10.1038/s41467-022-34378-3), 2022-11-07
Supplement: 41467_2022_34378_MOESM1_ESM.pdf [file 41467_2022_34378_MOESM1_ESM.pdf]

# **Structure of the IscB- $\omega$ RNA ribonucleoprotein complex, the likely ancestor of CRISPR-Cas9**

Kato, Okazaki et al.

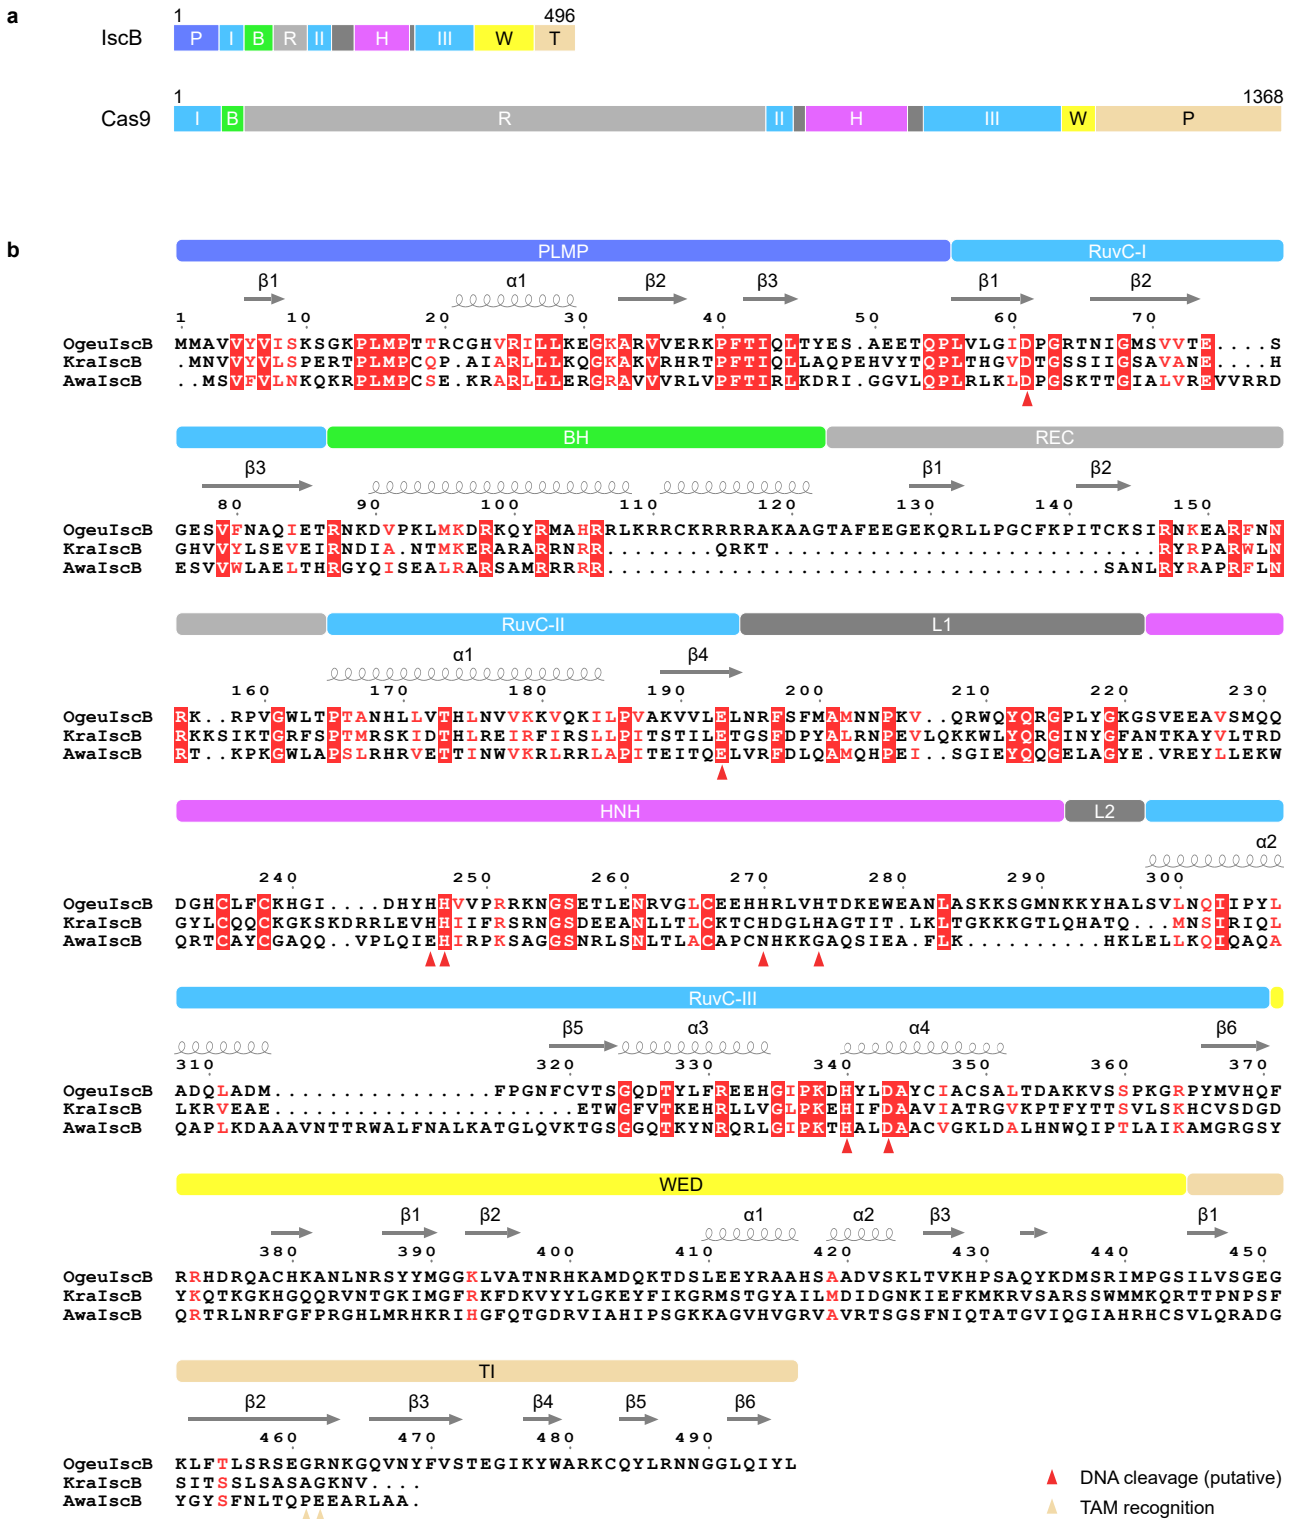

### Supplementary Figure 1 | Domain organization.

**a** Domain structures of OgeulscB and SpCas9. P, PLMP; I-III, RuvC-I-III; B, bridge helix; R, REC; H, HNH; W, WED; T, TI; P, PI.

**b** Multiple sequence alignment of the IscB proteins. OgeulscB, IscB from the human gut metagenome (OGEU01000025.1); KraIscB, IscB from *Ktedonobacter racemifer* (ADVG01000004.1); AwaIscB, IscB from *Allochrochromatium warmingii* (FNOW01000019.1). The figure was prepared using Clustal Omega (<http://www.ebi.ac.uk/Tools/msa/clustalo>) and ESPript3 (<http://esript.ibcp.fr/ESPript/ESPript>).

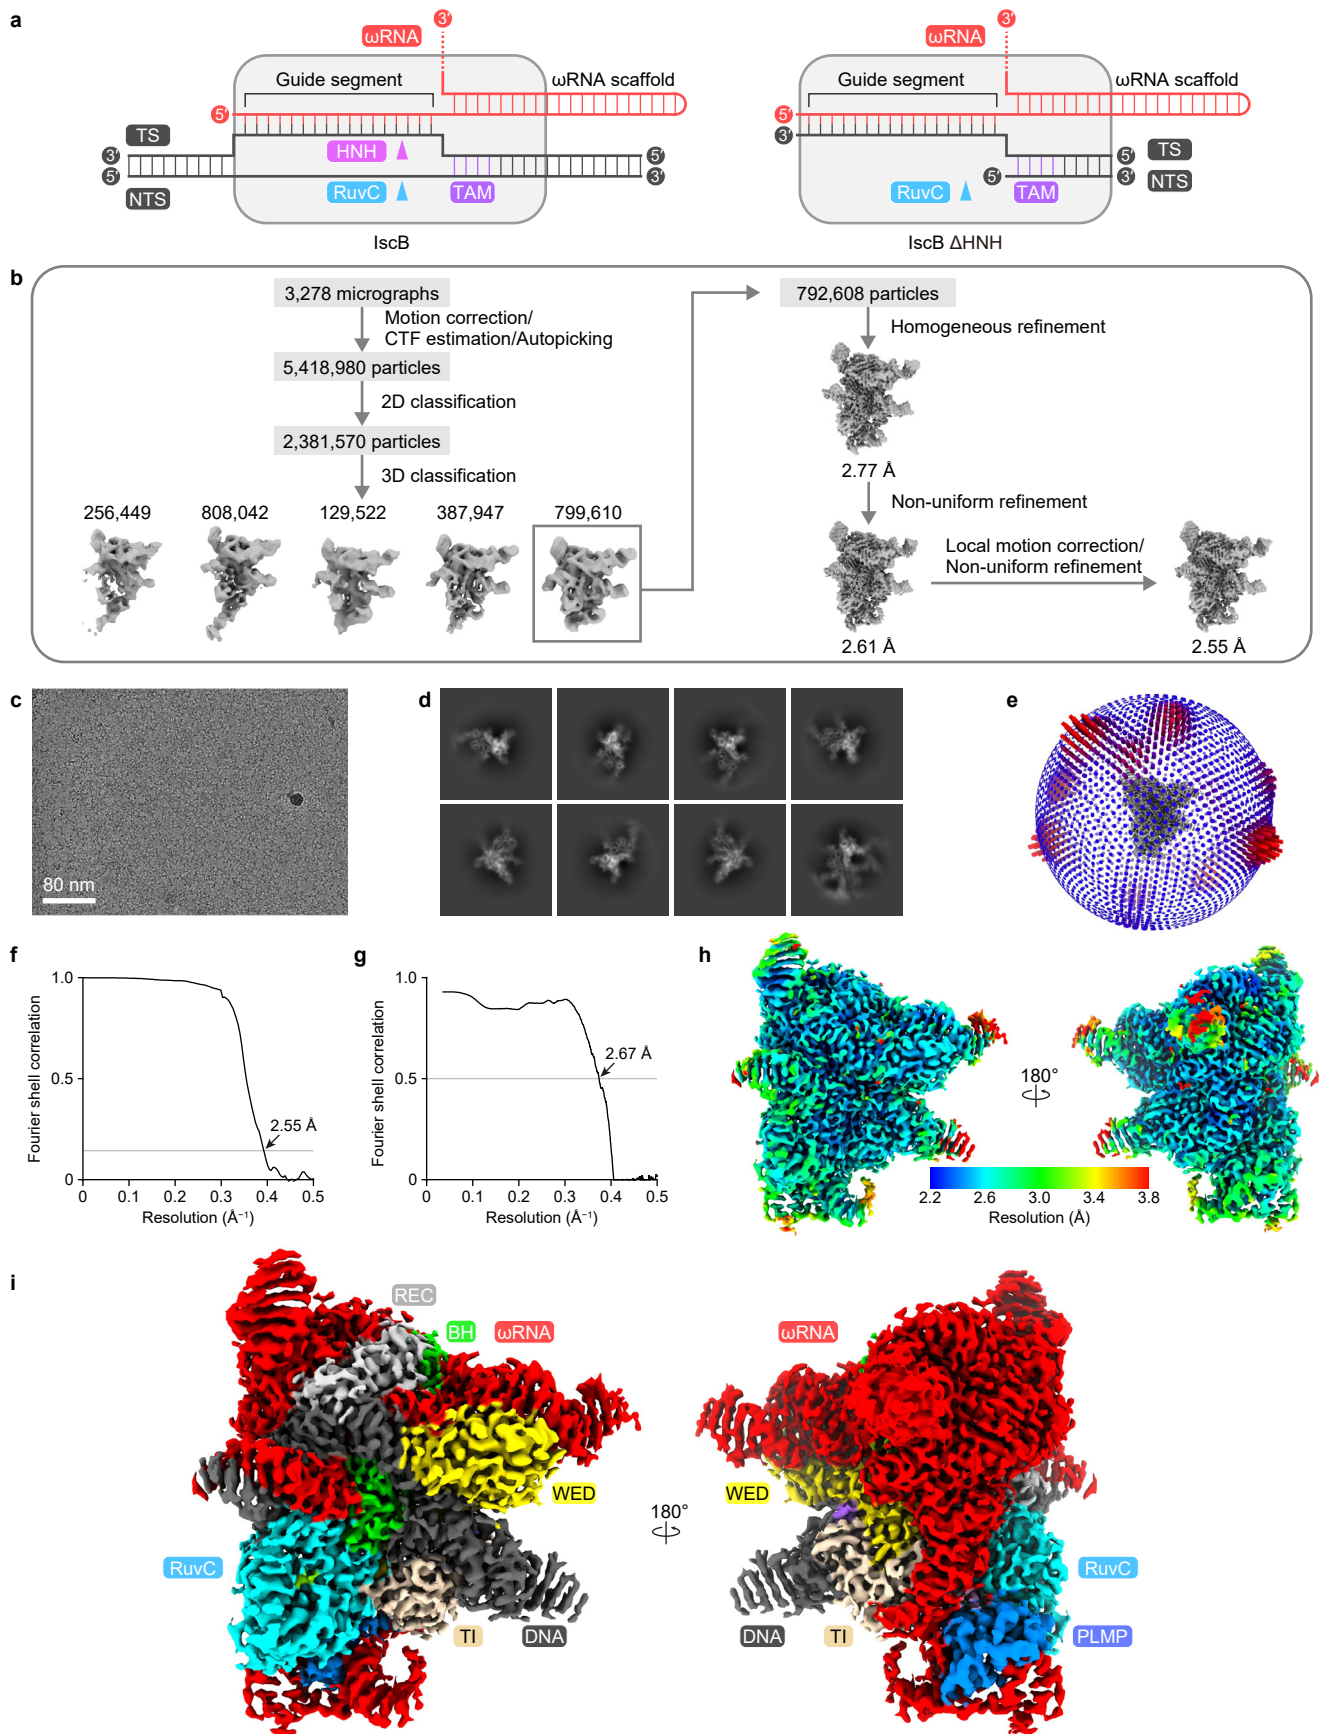

### Supplementary Figure 2 | Cryo-EM analysis.

**a** Schematic of the  $\omega$ RNA-guided DNA cleavage by IscB and the IscB- $\omega$ RNA-target DNA complex used for the cryo-EM analysis. The IscB  $\Delta$ HNN mutant, in which residues 199–295 were substituted with GGSG, was used for the cryo-EM analysis. The IscB  $\Delta$ HNN mutant contains the RuvC catalytic residues (D61, E193, and D343).

**b** Single-particle cryo-EM image processing workflow.

**c** Representative micrograph at a magnification of  $\times 105,000$ .

**d** Representative 2D averaged class images from the particles used for final reconstruction.

**e** Euler angle distribution of particles in the final reconstruction.

**f** Fourier shell correlation curve calculated between the half-maps in the 3D reconstruction.

**g** Fourier shell correlation curve calculated between the refined model and the density map.

**h, i** Cryo-EM density maps according to the local resolution (**h**) and the structural domains (**i**).



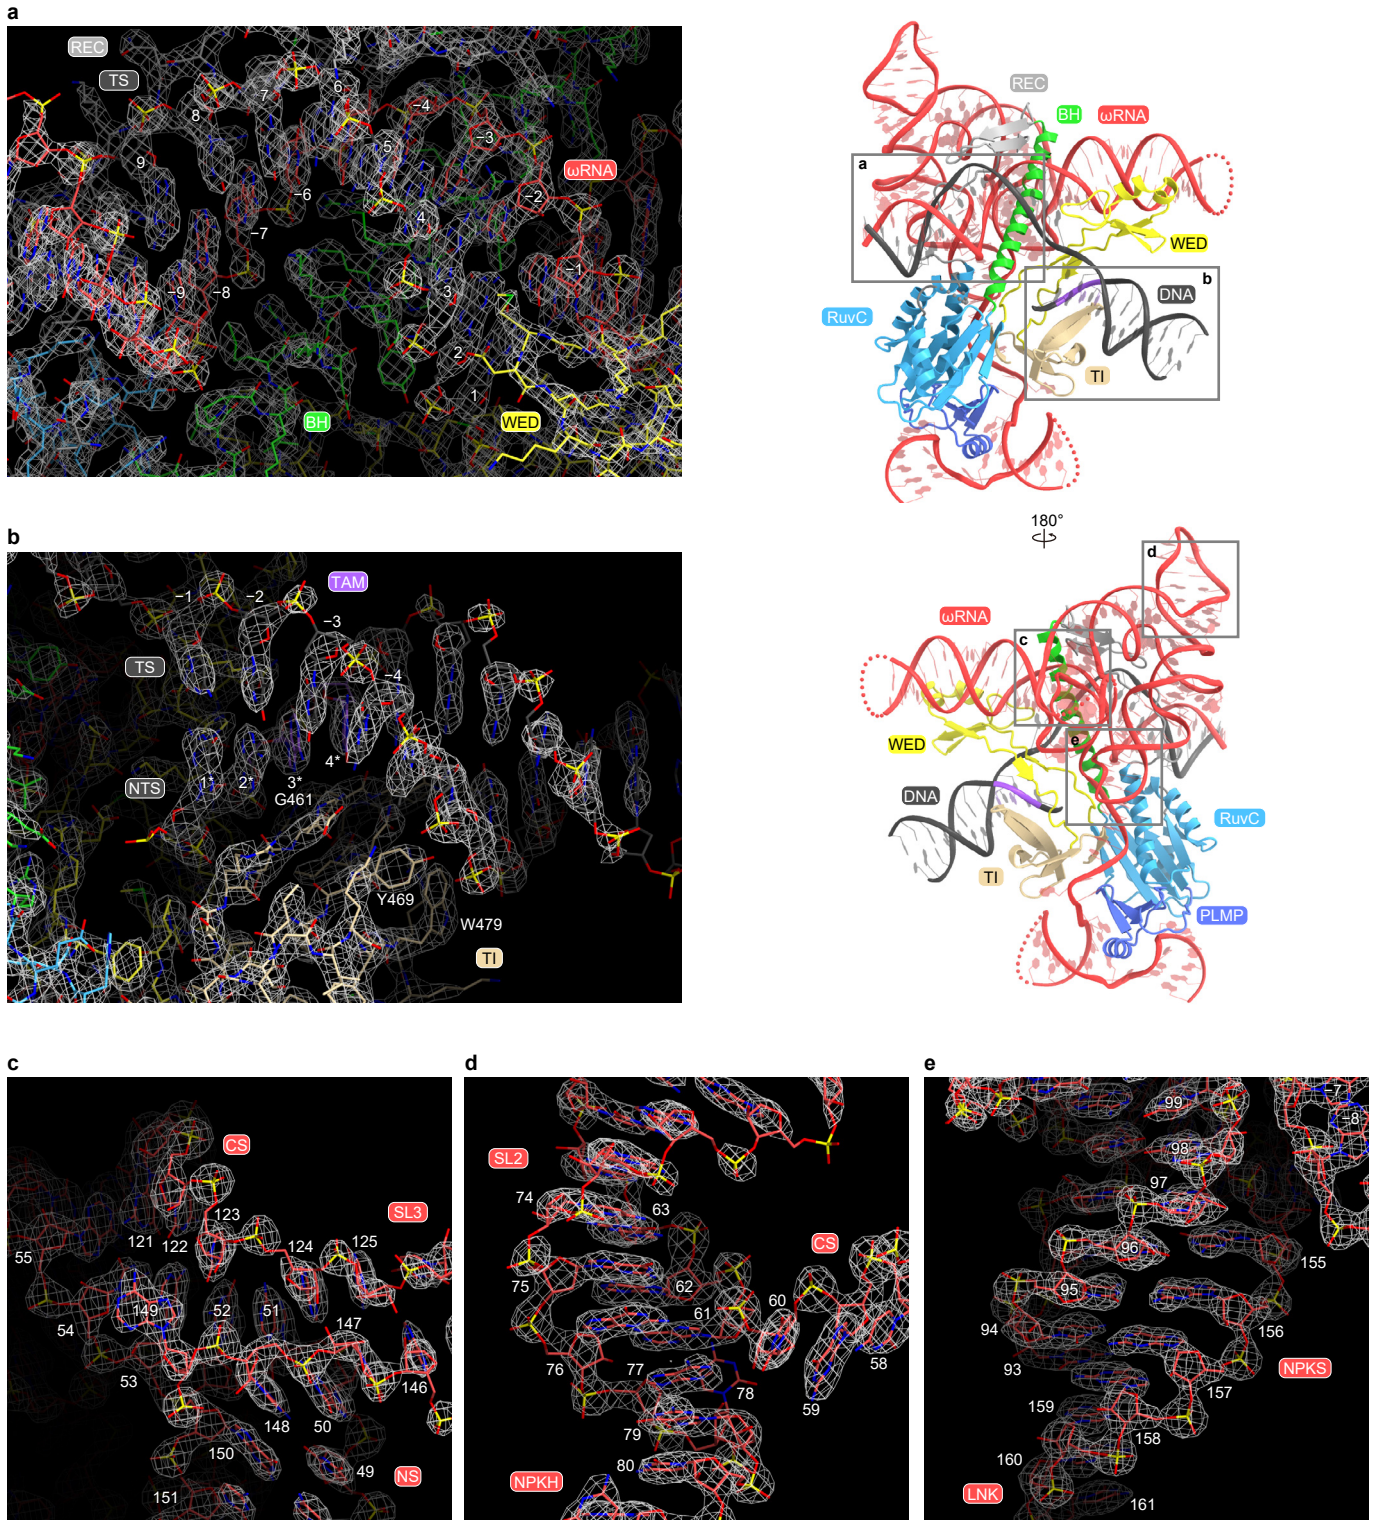

**Supplementary Figure 3 | Cryo-EM density map.**

Cryo-EM density maps for the guide RNA–target DNA heteroduplex (a), the TAM DNA duplex (b), and the ωRNA scaffold (c–e).



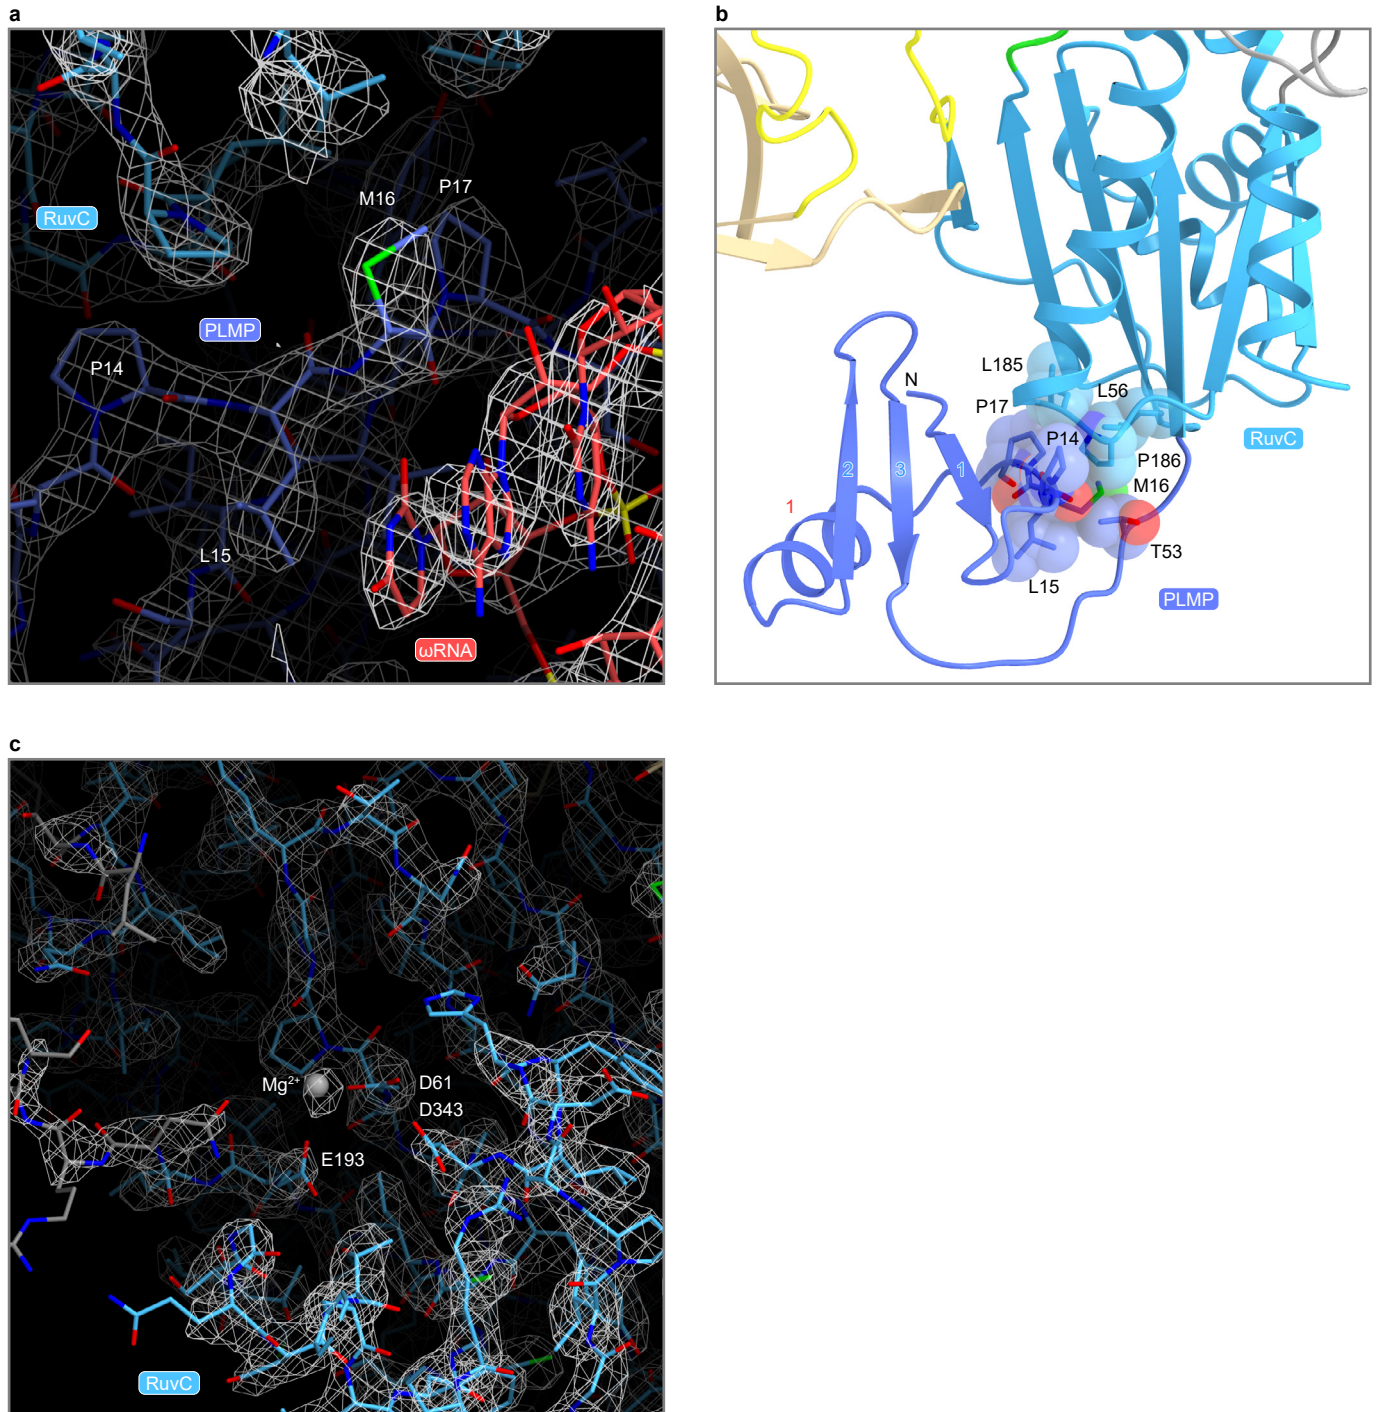

**Supplementary Figure 4 | Structure of the PLMP and RuvC domains.**

**a** Cryo-EM density map of the PLMP motif.

**b** Interactions between the PLMP and RuvC domains. Residues at the PLMP–RuvC interface are depicted as space-filling models.

**c** Cryo-EM density map of the RuvC active site. The bound Mg<sup>2+</sup> ion is depicted as a gray sphere.

IscB 1 496  
 P I B R II H III W T

Cas9 1 1368  
 I B R II H III W P

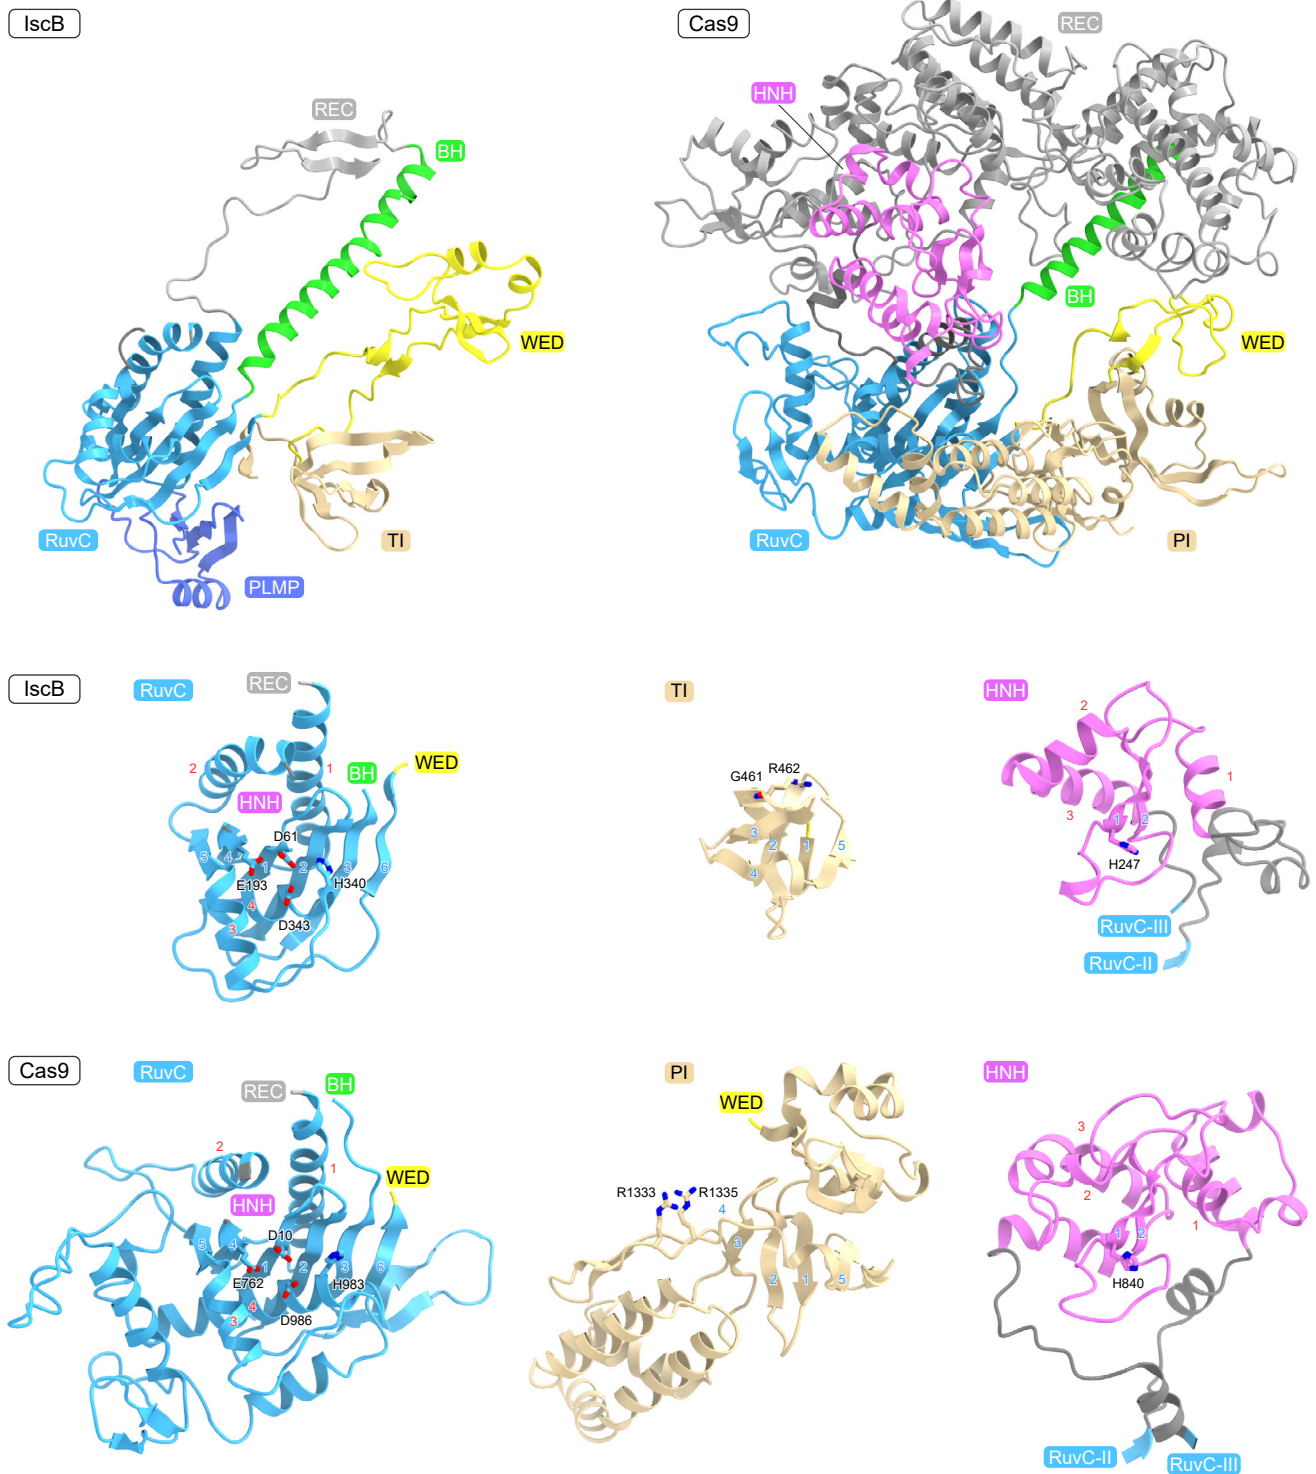

**Supplementary Figure 5 | Structural comparison between IscB and Cas9.**

The structures of IscB and SpCas9 (PDB: 5F9R) were aligned, based on their RuvC domains. The HNH domain of IscB was predicted by AlphaFold2. The catalytic residues in the RuvC and HNH domains and the TAM/PAM-interacting residues in the TI/PI domains are shown as stick models. The core  $\alpha$ -helices and  $\beta$ -strands in each domain are numbered in red and blue, respectively.



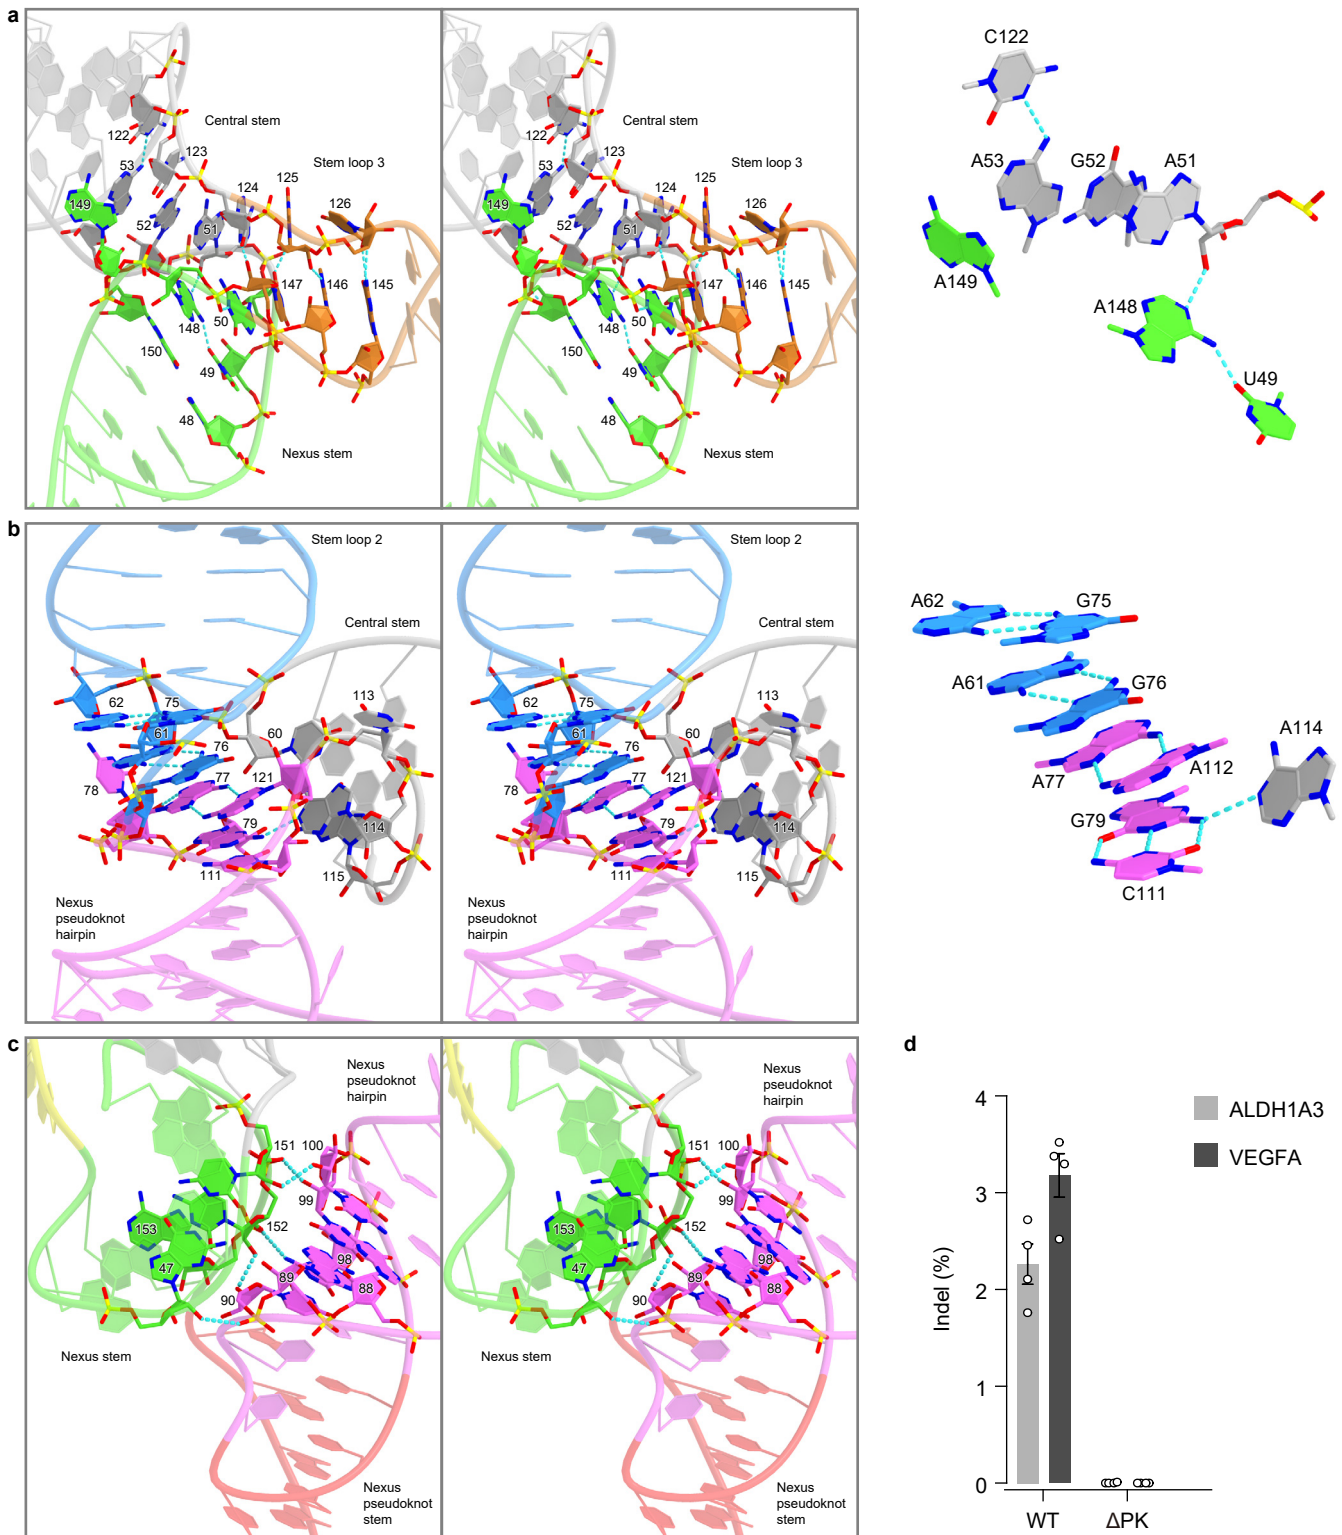

### Supplementary Figure 6 | $\omega$ RNA architecture.

**a–c** Stereo views of the three-way junction (nexus stem, central stem, and stem loop 3) (**a**), the three-way junction (central stem, stem loop 2, and nexus pseudoknot hairpin) (**b**), and the interface between the nexus stem and the nexus pseudoknot hairpin (**c**). In (**a**), N6 of A148 hydrogen bonds with O2 of U49, forming a non-canonical A-U base pair. In (**a**) and (**b**), close-up views of the key interactions are shown on the right of the stereo views.

**d** Indel activities of the wild-type (WT) IscB in complex with the WT  $\omega$ RNA or the  $\Delta$ PK  $\omega$ RNA mutant, in which nucleotides C93–C96 were replaced with GGGG. Data are mean  $\pm$  s.e.m. ( $n = 4$ , biologically independent samples). The experiments were repeated four times with similar results. Source data are provided at the end of the Supplementary Information.





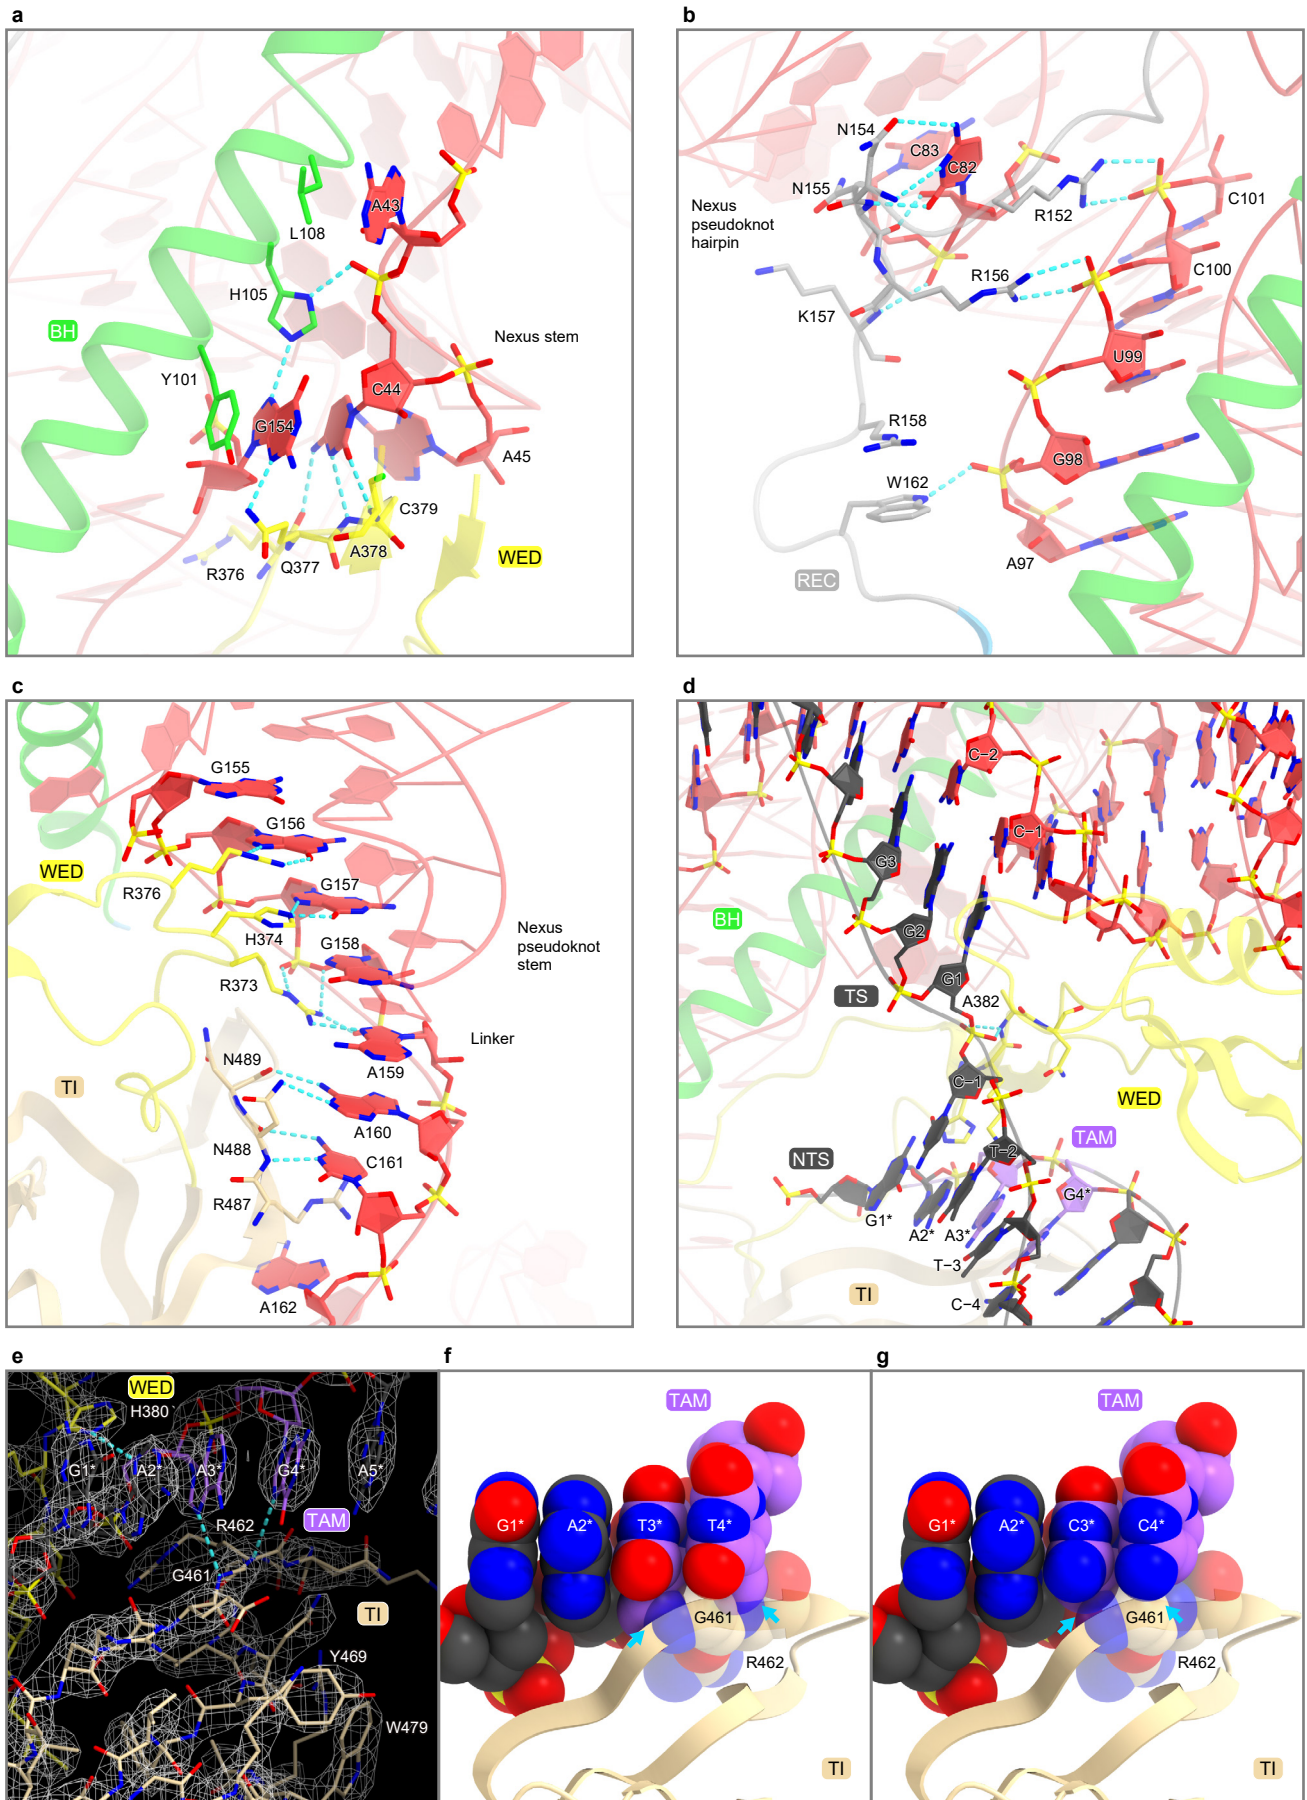

**Supplementary Figure 8 | IscB- $\omega$ RNA-DNA interactions.**

**a–d** Recognition of the nexus stem (**a**), the nexus pseudoknot hairpin (**b**), the nexus pseudoknot stem and linker (**c**), and the TAM duplex (**d**).

**e** Cryo-EM density map of the TI domain and the TAM. Hydrogen bonds are indicated by dashed lines.

**f, g** Manual modeling of T (**f**) and C (**g**) nucleotides at positions 3 and 4 in the NNRR TAM. The TAM nucleotides and G461/R462 are depicted by space-filling models. Possible steric clashes between the modeled T/C bases and G461/R462 are indicated by cyan arrows.

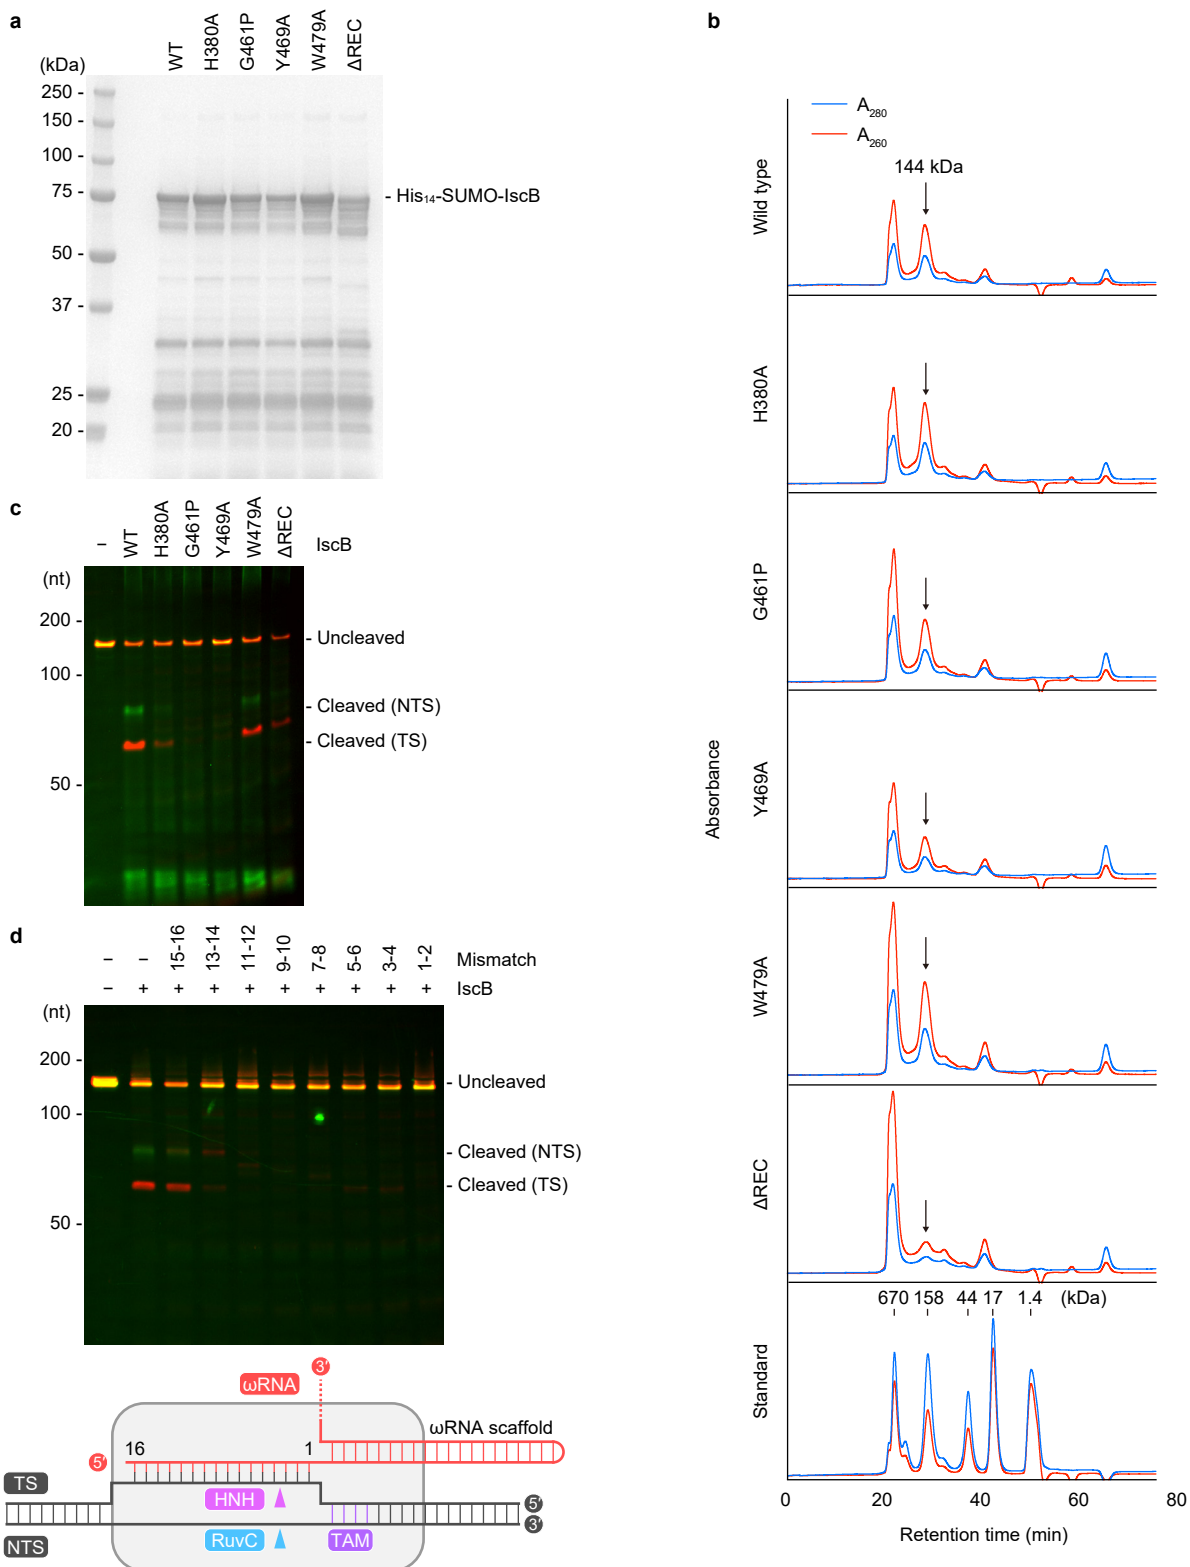

### Supplementary Figure 9 | *In vitro* DNA cleavage experiments.

**a** SDS-PAGE analysis of the IscB- $\omega$ RNA complexes (WT and mutants) used for *in vitro* DNA cleavage experiments. The IscB- $\omega$ RNA complexes were purified on NiNTA and RESOURCE Q columns.

**b** Size-exclusion chromatography analysis of the purified IscB- $\omega$ RNA complexes (WT and mutants). The IscB- $\omega$ RNA complexes were purified by chromatography on NiNTA and RESOURCE Q columns, and then aliquots of the peak fractions from the RESOURCE Q step were analyzed on a Superdex 200 10/300 Increase column. The active fractions are indicated by arrows. Like the WT, the H380A, G461P, Y469A, and W479A mutants eluted from the gel-filtration column as symmetrical peaks, indicating that these mutations do not substantially affect the overall structures. In contrast, the peak fraction of the  $\Delta$ REC mutant was relatively smaller, suggesting the importance of the REC linker for maintaining the structural integrity of the IscB- $\omega$ RNA complex.

**c** *In vitro* DNA cleavage activities of WT and mutant IscBs. The 150-bp double-stranded target DNA was incubated with the IscB- $\omega$ RNA complex (WT or mutants) at 37°C for 1 h, and then the reaction was analyzed using a 10% TBE-urea gel.

**d** Effects of mismatches between the  $\omega$ RNA guide and the target DNA on IscB-mediated DNA cleavage. The 150-bp double-stranded target DNA (containing no mismatch or 2-nt mismatches at positions 1–16) was incubated with the WT IscB- $\omega$ RNA complex at 37°C for 1 h, and then the reaction was analyzed by 10% denaturing urea-PAGE. In (c) and (d), the target DNA strand (TS) and non-target DNA strand (NTS) were visualized, using Cy5 and FAM fluorescence, respectively.

The experiments were repeated at least three times with similar results. Source data are provided at the end of the Supplementary Information.



**Supplementary Table 1 | Cryo-EM data collection, refinement, and validation statistics.**

|                                                     | OgeulscB<br>(EMDB-33198)<br>(PDB 7XHT) |
|-----------------------------------------------------|----------------------------------------|
| <hr/>                                               |                                        |
| Data collection and processing                      |                                        |
| Magnification                                       | 105,000                                |
| Voltage (kV)                                        | 300                                    |
| Electron exposure (e <sup>-</sup> /Å <sup>2</sup> ) | 47.9                                   |
| Defocus range (μm)                                  | -0.8 to -2.0                           |
| Pixel size (Å)                                      | 0.83                                   |
| Symmetry imposed                                    | C1                                     |
| Initial particle images (no.)                       | 5,418,980                              |
| Final particle images (no.)                         | 792,405                                |
| Map resolution (Å)                                  | 2.55                                   |
| FSC threshold                                       | 0.143                                  |
| <br>                                                |                                        |
| Refinement                                          |                                        |
| Model resolution (Å)                                | 2.67                                   |
| FSC threshold                                       | 0.5                                    |
| Map sharpening <i>B</i> factor (Å <sup>2</sup> )    | 92.6                                   |
| Model composition                                   |                                        |
| Non-hydrogen atoms                                  | 7839                                   |
| Protein residues                                    | 395                                    |
| Nucleotide residues                                 | 220                                    |
| Ligands                                             | 3                                      |
| <i>B</i> factors (Å <sup>2</sup> )                  |                                        |
| Protein                                             | 27.37                                  |
| Nucleotide                                          | 24.88                                  |
| Ligand                                              | 35.73                                  |
| R.m.s. deviations                                   |                                        |
| Bond lengths (Å)                                    | 0.003                                  |
| Bond angles (°)                                     | 0.539                                  |
| Validation                                          |                                        |
| MolProbity score                                    | 1.34                                   |
| Clashscore                                          | 6.14                                   |
| Poor rotamers (%)                                   | 0.00                                   |
| Ramachandran plot                                   |                                        |
| Favored (%)                                         | 98.21                                  |
| Allowed (%)                                         | 1.79                                   |
| Disallowed (%)                                      | 0.00                                   |

---

**Supplementary Table 2 | Nucleotide sequences used in this study.**

| Cryo-EM analysis |                                                                                                                                                                                                                                                    |
|------------------|----------------------------------------------------------------------------------------------------------------------------------------------------------------------------------------------------------------------------------------------------|
| Name             | Sequence                                                                                                                                                                                                                                           |
| ωRNA             | <u>GGAAUUUGUGAGCGGAUAACAAUCCCGGCUCUCCAACUUUAUGGUUGCGACCGUAGGUUGAAAAGACACAGGCUGAG</u><br>ACAUUCGUAAGGCCGAAAGACCGGACGCACCCUGGGAUUCCCGAGUCCCGGAACUGCAUAGCGGAUGCCAGUUGAUG<br>GAGCAUUCUAUCAGAUAGGCCAGGGGGAACAAUACCUCUCUGUAUCAGAGAGAUUUUACAAAAGGAGGAACGG |
| TS               | GAATGTTTTCTTCGGGAATTGTTATCCGCTCACAATTCCTTAGAAAA                                                                                                                                                                                                    |
| NTS              | <u>GAAGAAACCATTC</u>                                                                                                                                                                                                                               |

The guide sequence in the ωRNA and its complementary sequence in the TS are underlined. The TAM sequence (GAAG) in the NTS is colored purple.

pETDuet-OgeulscB\_1 <https://benchling.com/s/seq-fj7MEXHIBYNTgn7gRgQV?m=slm-VJtf6i7HfXSztOdwYih>

*In vitro* DNA cleavage assays

| Name        | Sequence                                                                                        |
|-------------|-------------------------------------------------------------------------------------------------|
| On-target_F | <u>CCCACGAAGGGTTACGG</u> CACCTTAACCCCTT <u>ATTAGGTGCGCTTGGCCTAG</u> AAGTCTGAAAAGGTCATTTTTAAAGCC |
| MM12_F      | <u>CCCACGAAGGGTTACGG</u> CACCTTAACCCCTT <u>ATTAGGTGCGCTTGGCCTAG</u> AAGTCTGAAAAGGTCATTTTTAAAGCC |
| MM34_F      | <u>CCCACGAAGGGTTACGG</u> CACCTTAACCCCTT <u>ATTAGGTGCGCTaCGCCTAG</u> AAGTCTGAAAAGGTCATTTTTAAAGCC |
| MM56_F      | <u>CCCACGAAGGGTTACGG</u> CACCTTAACCCCTT <u>ATTAGGTGCGGatGGCCTAG</u> AAGTCTGAAAAGGTCATTTTTAAAGCC |
| MM78_F      | <u>CCCACGAAGGGTTACGG</u> CACCTTAACCCCTT <u>ATTAGGTGgcCTTGGCCTAG</u> AAGTCTGAAAAGGTCATTTTTAAAGCC |
| MM910_F     | <u>CCCACGAAGGGTTACGG</u> CACCTTAACCCCTT <u>ATTAGGacCGCTTGGCCTAG</u> AAGTCTGAAAAGGTCATTTTTAAAGCC |
| MM1112_F    | <u>CCCACGAAGGGTTACGG</u> CACCTTAACCCCTT <u>ATTAcCTGCGCTTGGCCTAG</u> AAGTCTGAAAAGGTCATTTTTAAAGCC |
| MM1314_F    | <u>CCCACGAAGGGTTACGG</u> CACCTTAACCCCTT <u>ATAtGGTGCGCTTGGCCTAG</u> AAGTCTGAAAAGGTCATTTTTAAAGCC |
| MM1516_F    | <u>CCCACGAAGGGTTACGG</u> CACCTTAACCCCTT <u>taTAGGTGCGCTTGGCCTAG</u> AAGTCTGAAAAGGTCATTTTTAAAGCC |
| On-target_R | <u>GGCTTTAAAAAATGACCTTTTCAGACT</u> TTCTAGGCCAAGCGCACCTAATAAGGGGTTAAGGTGCCGTAACCCCTTCGTGGG       |
| MM12_R      | <u>GGCTTTAAAAAATGACCTTTTCAGACT</u> TTCTAGCGcAAGCGCACCTAATAAGGGGTTAAGGTGCCGTAACCCCTTCGTGGG       |
| MM34_R      | <u>GGCTTTAAAAAATGACCTTTTCAGACT</u> TTCTAGGCgtAGCGCACCTAATAAGGGGTTAAGGTGCCGTAACCCCTTCGTGGG       |
| MM56_R      | <u>GGCTTTAAAAAATGACCTTTTCAGACT</u> TTCTAGGCCatcCGCACCTAATAAGGGGTTAAGGTGCCGTAACCCCTTCGTGGG       |
| MM78_R      | <u>GGCTTTAAAAAATGACCTTTTCAGACT</u> TTCTAGGCCAAGgcCACCTAATAAGGGGTTAAGGTGCCGTAACCCCTTCGTGGG       |
| MM910_R     | <u>GGCTTTAAAAAATGACCTTTTCAGACT</u> TTCTAGGCCAAGCGgtCCCTAATAAGGGGTTAAGGTGCCGTAACCCCTTCGTGGG      |
| MM1112_R    | <u>GGCTTTAAAAAATGACCTTTTCAGACT</u> TTCTAGGCCAAGCGCaggTAATAAGGGGTTAAGGTGCCGTAACCCCTTCGTGGG       |
| MM1314_R    | <u>GGCTTTAAAAAATGACCTTTTCAGACT</u> TTCTAGGCCAAGCGCACCaTATAAGGGGTTAAGGTGCCGTAACCCCTTCGTGGG       |
| MM1516_R    | <u>GGCTTTAAAAAATGACCTTTTCAGACT</u> TTCTAGGCCAAGCGCACCTatAAGGGGTTAAGGTGCCGTAACCCCTTCGTGGG        |
| FAM_F       | FAM-CCGCAAGAGGATGATTCGGGTGCGGCAACGGAAGGGGAGGGCC <u>CCACGAAGGGTTACGG</u>                         |
| Cy5_R       | Cy5-GCTGATCTGATGCAGTTAAGTGCTGCTGG <u>CTTTAAAAAATGACCTTTTCAGACT</u>                              |

The target sequences are underlined. Mismatches are shown in lowercase. The TAM sequences (CTAG) are colored purple.

pETDuet-OgeulscB\_2 <https://benchling.com/s/seq-1R6enujAzTL44kexhfiM?m=slm-XsK2idX0ThkGW0HttP4R>

Genome editing assays

| Guides                  |                                                                     |
|-------------------------|---------------------------------------------------------------------|
| Target                  | Guide sequence                                                      |
| ALDH1A3                 | AGTGAAGAAGGAGAT                                                     |
| VEGFA                   | AAAAGAGTGAACGAGA                                                    |
| Non-targeting           | GTCGACGCATAGTCTG                                                    |
| NGS round 1 PCR primers |                                                                     |
| Target                  | Primer sequence                                                     |
| ALDH1A3_F               | <u>CTTTCCCTACACGACGCTCTCCGATCTCGGCACGAATCCAAGAGTGGGAAAAAG</u>       |
| ALDH1A3_R               | GACTGGAGTTCAGACGTGTGCTCTCCGATC <u>CCCATATGATGAGGATAGCTGAGGTCATC</u> |
| VEGFA_F                 | <u>CTTTCCCTACACGACGCTCTCCGATCTCGGCCCTCCTCTGTCCCAATTGT</u>           |
| VEGFA_R                 | GACTGGAGTTCAGACGTGTGCTCTCCGATC <u>CCCTCCAAGGCTGCTTTCCAGA</u>        |

Primer-binding sequences are underlined.

## Source data: Raw data for Supplementary Figure 6d: Indel activity

| Table format:<br>Grouped |                    | Group A |      |      |      | Group B |      |      |      |
|--------------------------|--------------------|---------|------|------|------|---------|------|------|------|
|                          |                    | ALDH1A3 |      |      |      | VEGFA   |      |      |      |
|                          | x                  | A:Y1    | A:Y2 | A:Y3 | A:Y4 | B:Y1    | B:Y2 | B:Y3 | B:Y4 |
| 1                        | WT                 | 2.72    | 2.11 | 1.76 | 2.46 | 3.30    | 3.38 | 3.52 | 2.52 |
| 2                        | E129-K144 deletion | 0.01    | 0.00 | 0.01 | 0.00 | 0.00    | 0.02 | 0.02 | 0.00 |
| 3                        | H380A              | 0.84    | 0.74 | 1.08 | 0.93 | 0.43    | 0.28 | 0.17 | 0.31 |
| 4                        | G461P              | 0.00    | 0.00 | 0.00 | 0.00 | 0.00    | 0.00 | 0.00 | 0.02 |
| 5                        | Y469A              | 0.15    | 0.16 | 0.15 | 0.25 | 0.00    | 0.07 | 0.02 | 0.00 |
| 6                        | W479A              | 2.83    | 1.01 | 2.23 | 2.68 | 0.84    | 1.04 | 1.26 | 0.84 |
| 7                        | 93-CCCC-96 -> GGGG | 0.00    | 0.00 | 0.00 | 0.01 | 0.00    | 0.00 | 0.00 | 0.00 |

Supplementary Figure 6d



Source data: Uncropped gels for Supplementary Figure 9

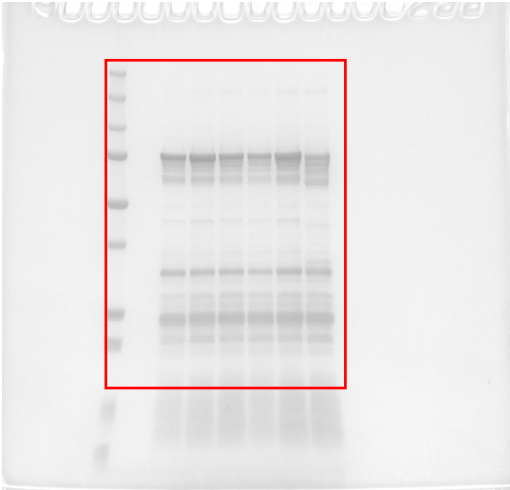

Supplementary Figure 9a

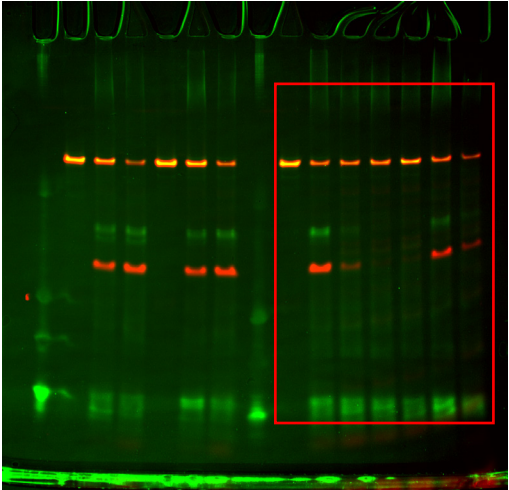

Supplementary Figure 9c

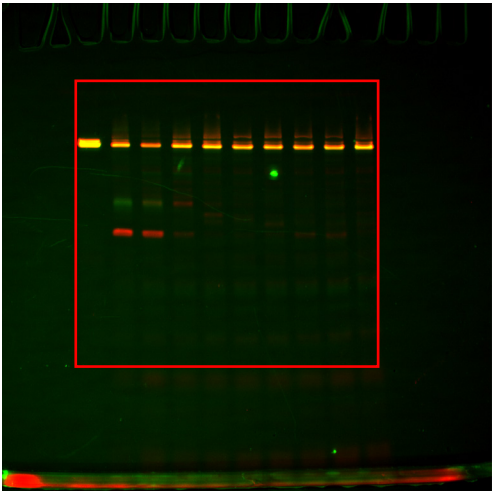

Supplementary Figure 9d
