# Supplementary material for: Structure of the IscB–ωRNA ribonucleoprotein complex, the likely ancestor of CRISPR-Cas9
Source: PubMed Central journal article supplement (PMC9640706; doi:10.1038/s41467-022-34378-3), 2022-11-07
Supplement: 41467_2022_34378_MOESM3_ESM.pdf [file 41467_2022_34378_MOESM3_ESM.pdf]

## **Description of Additional Supplementary Files**

File Name: Supplementary Movie 1

Description: Cryo-EM density of the IscB- $\omega$ RNA-DNA complex.

File Name: Supplementary Movie 2

Description: Structure of the IscB- $\omega$ RNA-DNA complex.

File Name: Supplementary Movie 3

Description: Structure of the  $\omega$ RNA.
